# Supplementary material
Source: PubMed Central journal article supplement (PMC7709865)
Supplement: NIHMS1642686-supplement-Supplementary_Figures_and_Tables.pdf [file NIHMS1642686-supplement-Supplementary_Figures_and_Tables.pdf]

## **Supplementary Materials**

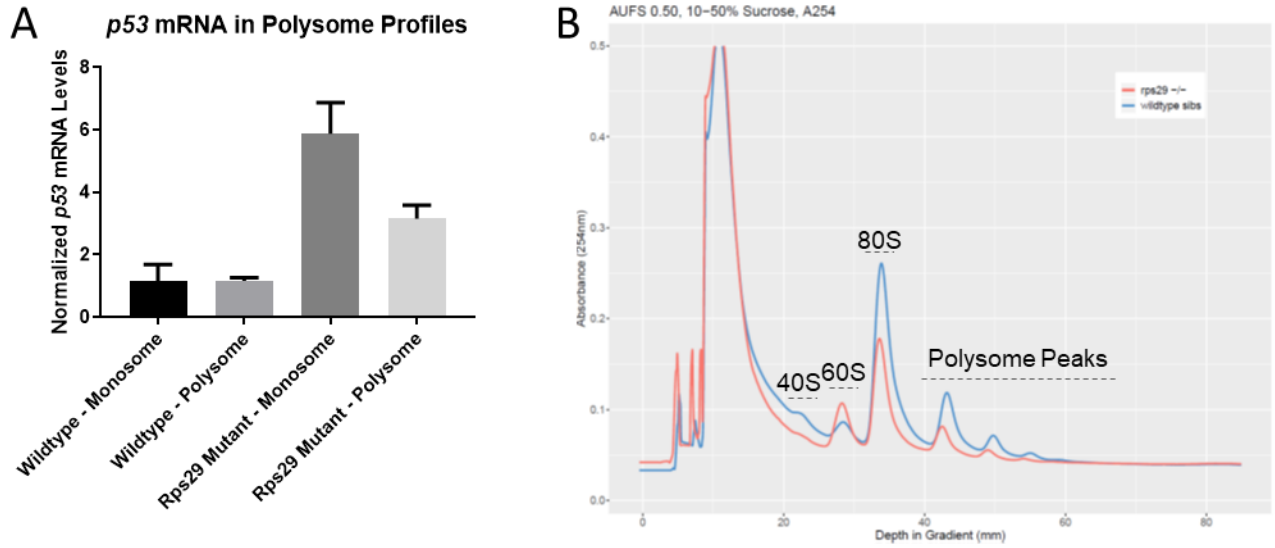

**Fig. S1. *p53* is translated in higher amounts in a zebrafish model of Diamond-Blackfan anemia.**

- A. Polysome profiles were generated from 24 hpf wildtype (AB) zebrafish embryos and *rps29*<sup>-/-</sup> embryos. mRNA isolated from monosome and polysome fractions was analyzed by qPCR. Y-axis represents *p53* normalized to *tol2* mRNA spiked in the fractions.
- B. Polysome profiles were generated from 24 hpf *rps29*<sup>-/-</sup> embryos and the sibling *rps29*<sup>+/+</sup> and *rps29*<sup>+/-</sup> embryos. Y-axis is absorbance, x-axis is sedimentation fraction.

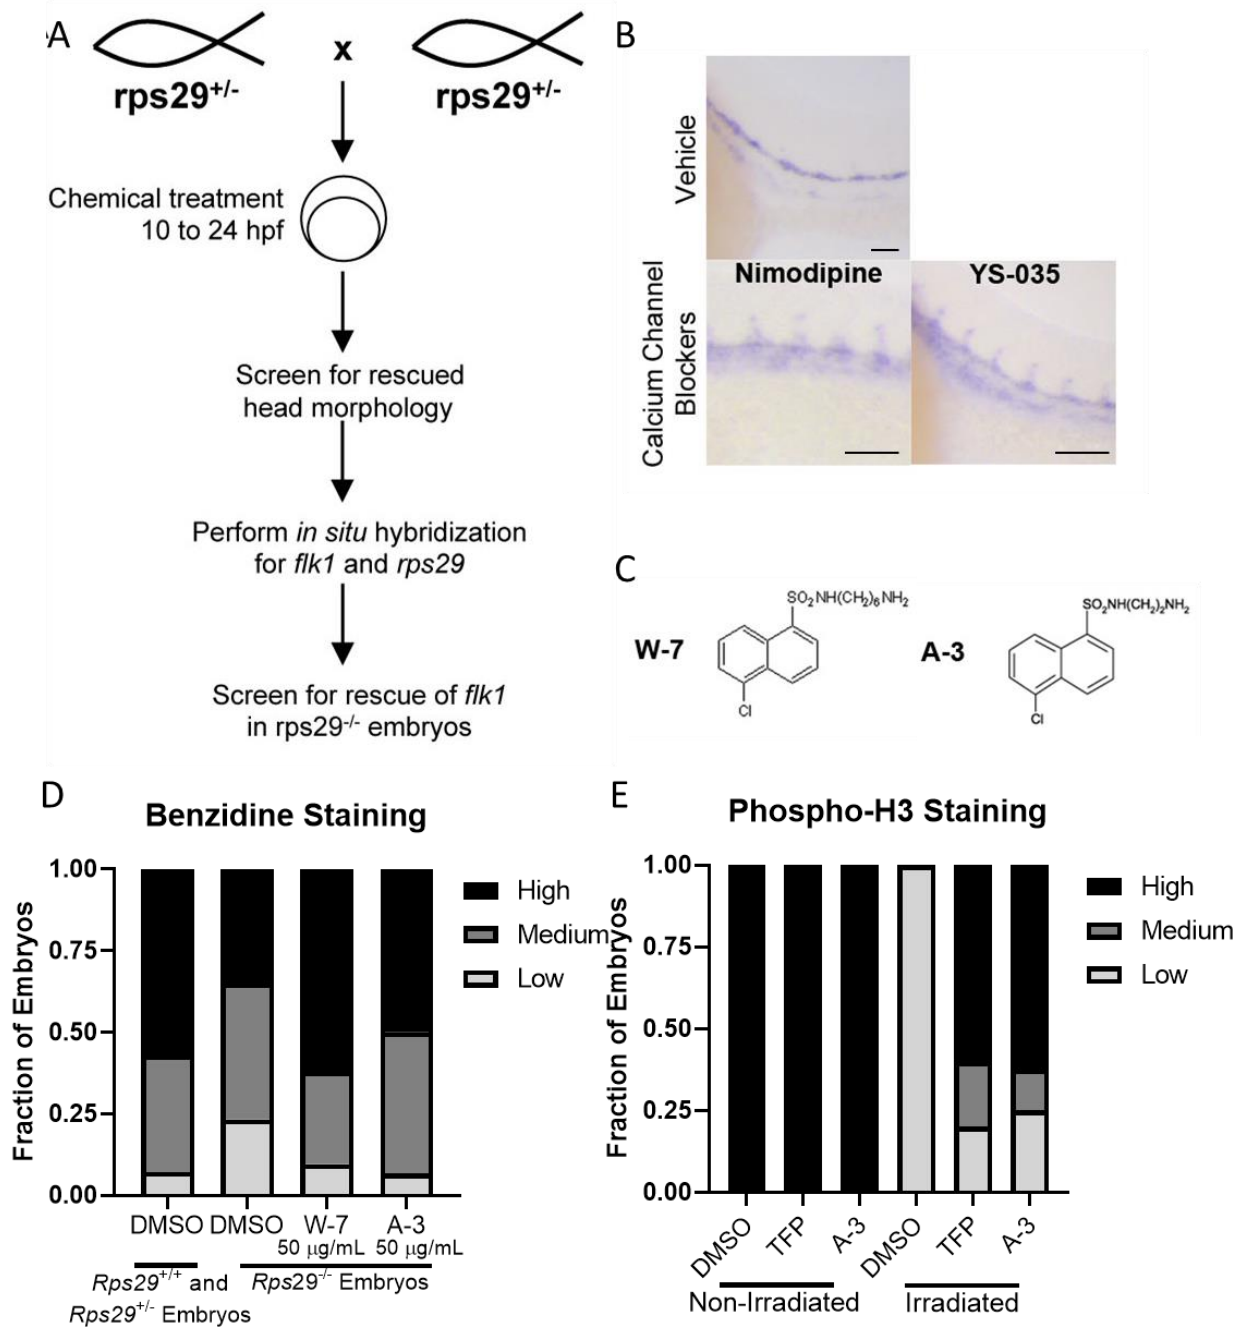

**Fig. S2. Chemical screen identifies calmodulin inhibitors and calcium channel blockers.**

A. Chemical screen design.  $Rps29^{+/-}$  fish were incrossed and treated from bud (10 hpf) to 24 hpf with compounds of known bioactivity. At 24 hpf, mutant embryos were scored for

rescued head morphology. Embryos were then fixed for whole mount *in situ* hybridization (ISH) and stained for both *flkl* and *rps29*.

- B. *Rps29*<sup>-/-</sup> embryos were treated with nimodipine or YS-035 at 10 hpf and collected at 24 hpf for *in situ* hybridization of *flkl*. Scale bar = 100 μm.
- C. Chemical structures of naphthalenesulfonamides W-7 and A-3.
- D. Embryos from an *rps29*<sup>+/-</sup> incross were treated with DMSO, A-3, or W-7 at 10 hpf and collected at 40 hpf for benzidine (*o*-dianisidine) staining of hemoglobinized cells. Samples were analyzed by binning of stain amount – high, medium, or low. Representative photographs in Figure 1D.
- E. Wildtype embryos were treated with DMSO, A-3, or TFP at 50% epiboly (5.25 hpf), irradiated at 10 Gy at 24 hpf, and collected for phospho-H3 staining at 25.5 hpf. Samples were analyzed by binning of numbers of positively stained cells – high, medium, or low. Representative photographs in Figure 1E.

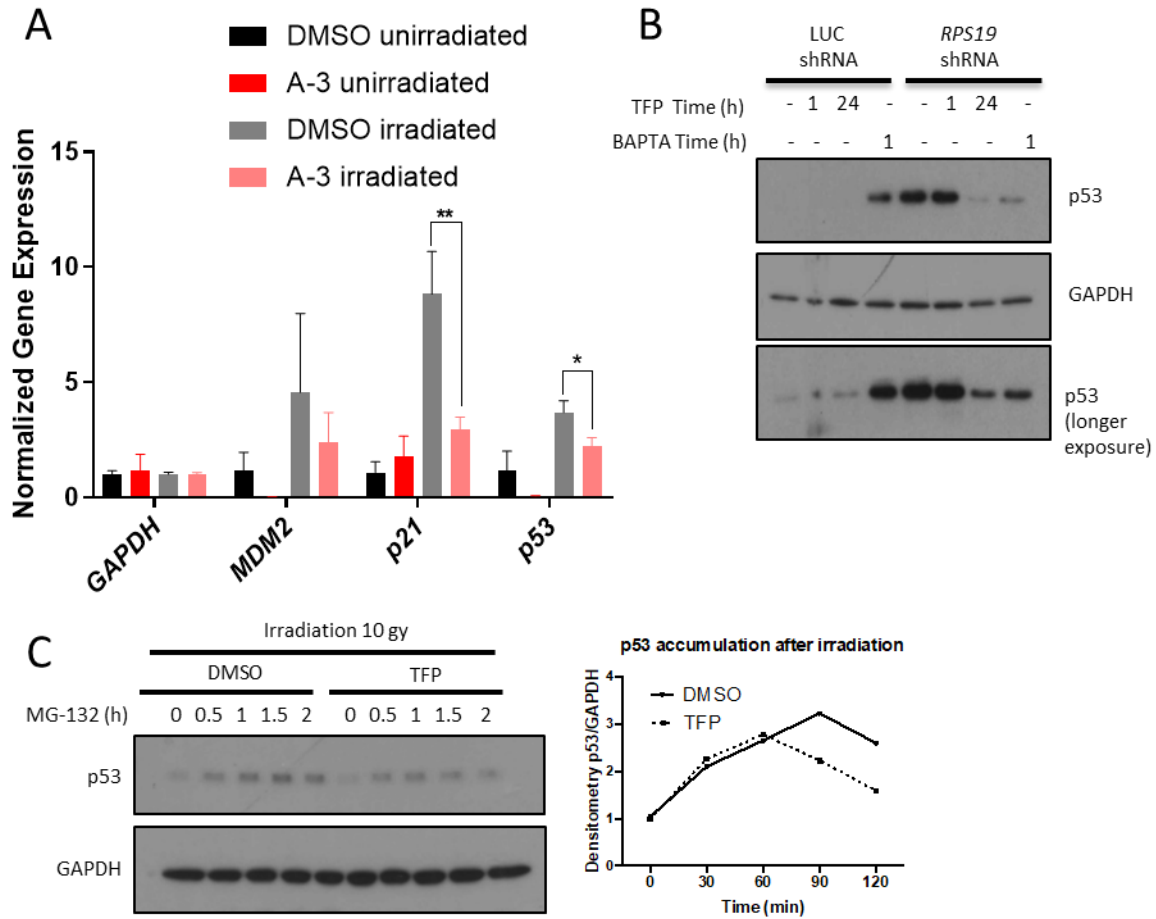

**Fig. S3. TFP and BAPTA decreases p53 accumulation.**

- A. Wildtype embryos were treated with DMSO or A-3 at 50% epiboly (5.25 hpf), irradiated at 10 Gy at 24 hpf, and collected for RNA isolation and qPCR at 25.5 hpf.
- B. CD34<sup>+</sup> cells were infected with shRNA against luciferase or *RPS19*, and GFP<sup>+</sup> cells were selected for infection by FACS. Cells were treated with TFP or BAPTA, and Western blots for p53 and GAPDH were quantified by densitometry.
- C. Irradiated CD34<sup>+</sup> cells were pre-treated with TFP for 2 hours before treatment with 20  $\mu$ M MG-132 for increasing lengths of time, then lysates were collected for p53 and GAPDH protein quantification.

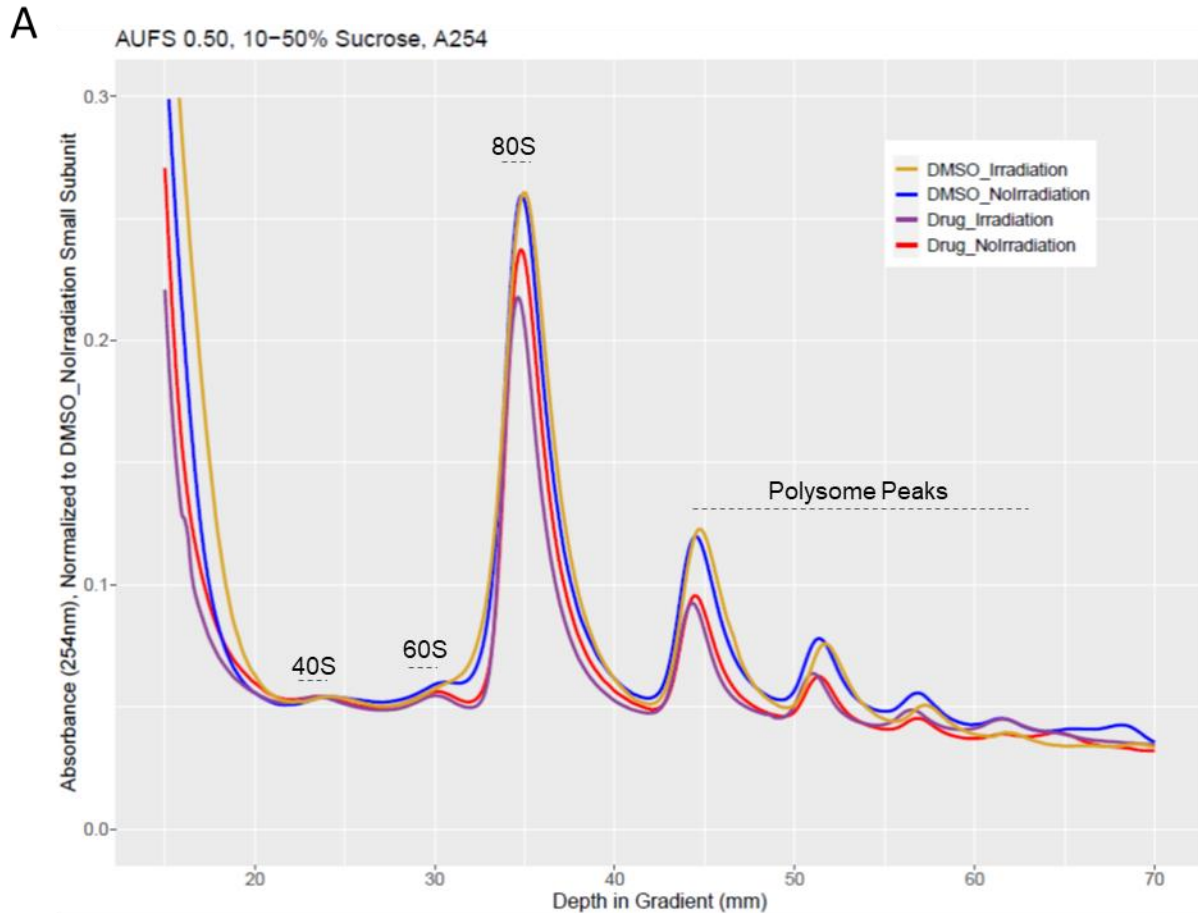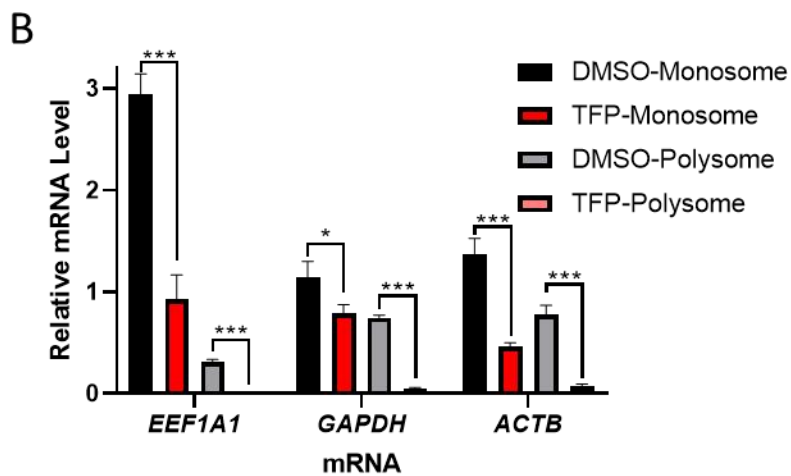

**Fig. S4. TFP treatment leads to decreased mRNAs in monosome and polysome fractions.**

A. Embryos at 50% epiboly were treated with DMSO or 50  $\mu$ M TFP before 10 Gy irradiation at 24 hpf and collected for preparation of polysome fractionation at 25 hpf. Y-axis is

absorbance, x-axis is sedimentation fraction. Polysome profiles are normalized to the 40s ribosomal subunit peak.

- B. RNA was isolated from monosome and polysome fractions of treated cells, and amounts of mRNAs *EEF1A1*, *GAPDH*, and *ACTβ* were measured by qPCR. Relative mRNA quantity represents Ct values normalized to each sample's pool of all polysome fractions. Student's t-test, \*p < 0.05, \*\*\* p < 0.001.

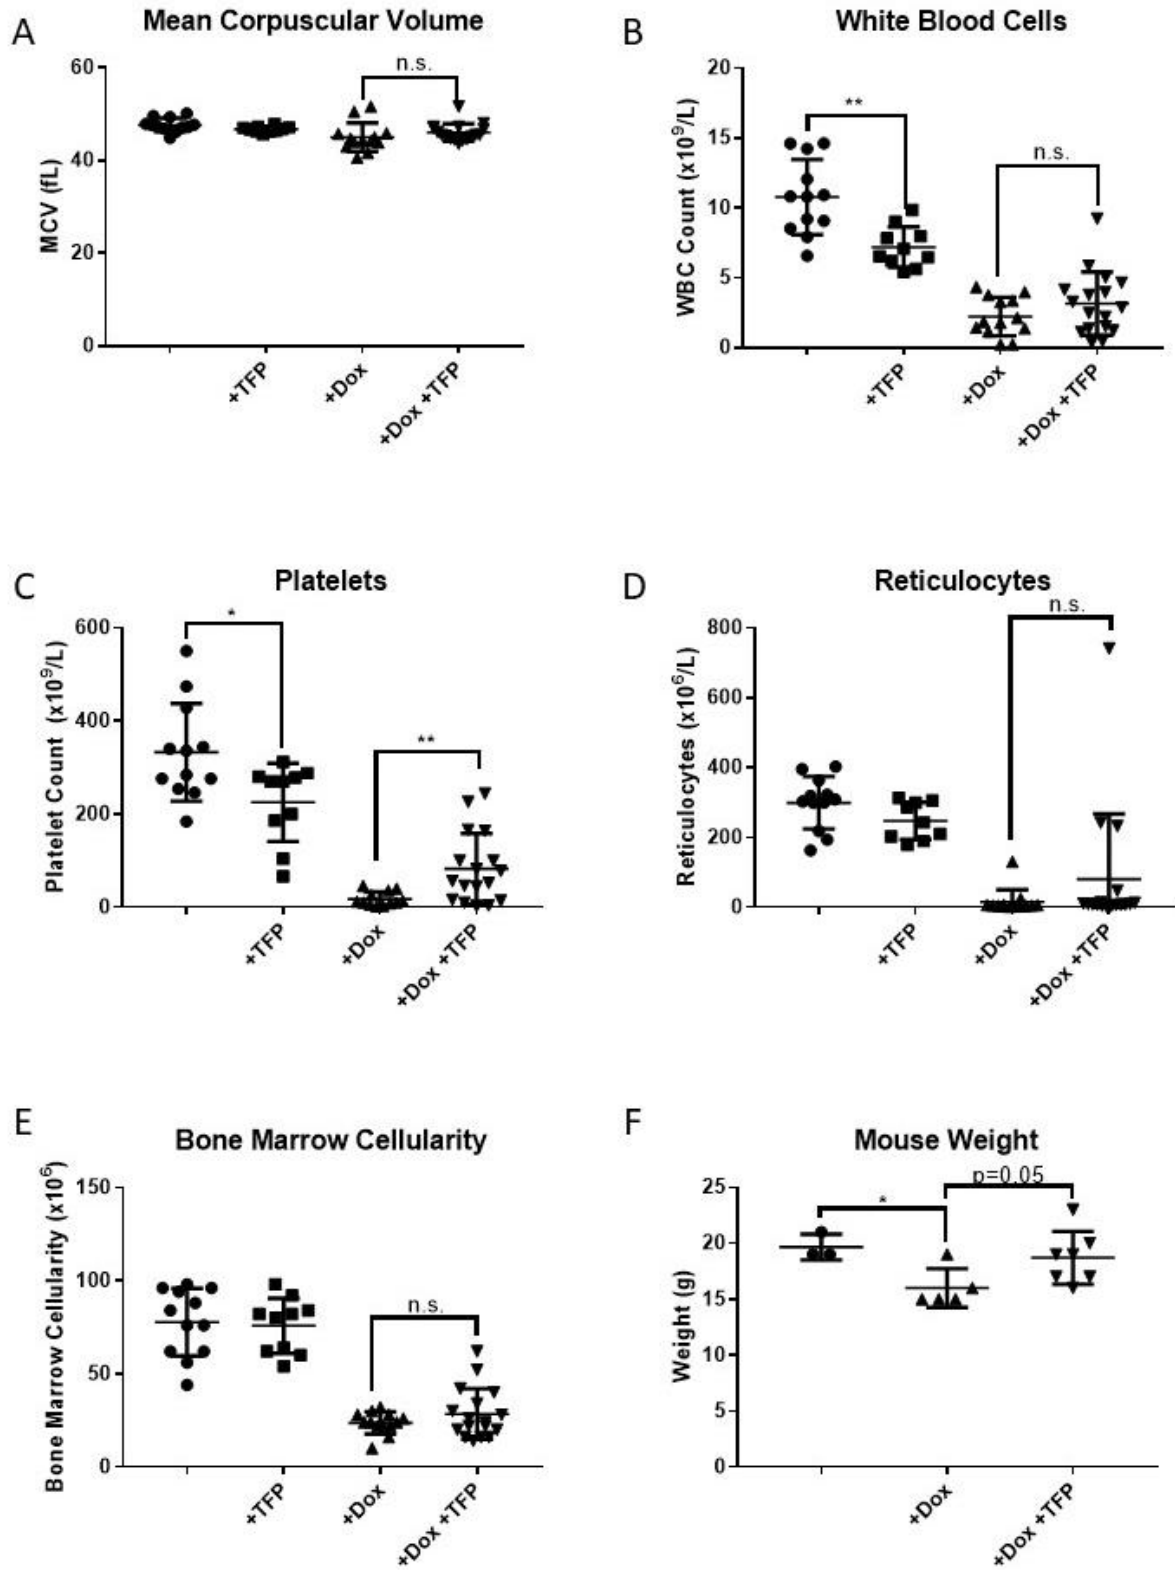

**Fig. S5. TFP improves platelet counts and mouse weight in a mouse model of Diamond-Blackfan anemia.**



Unfractionated bone marrow from inducible Rps19 shRNA donor mice was transplanted into irradiated wildtype recipients. After engraftment, hairpin expression was induced with doxycycline and mice were treated with TFP or vehicle for two weeks. The following were measured: (A) mean corpuscular volume (MCV), (B) white blood cells (WBC), (C) platelets, (D) reticulocytes, (E) bone marrow cellularity, and (F) mouse weight. Student's t-test, \*p < 0.05, \*\* p < 0.01.

+TFP = TFP-treated without dox, RPS19 is wildtype

+Dox = doxycycline-treated without TFP, RPS19 is knocked down by shRNA

+Dox+TFP = both doxycycline- and TFP-treated, RPS19 is knocked down by shRNA

|                                                      |                           |                            |
|------------------------------------------------------|---------------------------|----------------------------|
| <b><u>Calmodulin/Calcium Channel Antagonists</u></b> | <b><u>Flk Rescue?</u></b> | <b><u>Head Rescue?</u></b> |
| W-7                                                  | Yes                       | No                         |
| A-3                                                  | No                        | Yes                        |
| YS-035                                               | Yes                       | No                         |
| Nimodipine                                           | Yes                       | No                         |
|                                                      |                           |                            |
| <b><u>Other Ion Channel Inhibitors</u></b>           | <b><u>Flk Rescue?</u></b> | <b><u>Head Rescue?</u></b> |
| 5-hydroxydecanoate                                   | Yes                       | No                         |
| Procainamide                                         | Yes                       | No                         |
| Fipronil                                             | Yes                       | No                         |
|                                                      |                           |                            |
| <b><u>Bioactive Lipids</u></b>                       | <b><u>Flk Rescue?</u></b> | <b><u>Head Rescue?</u></b> |
| Leukotriene D4                                       | Yes                       | No                         |
| Eicosatrieonic acid (20:3 n-3)                       | Yes                       | No                         |
|                                                      |                           |                            |
| <b><u>Nitric Oxide Pathway</u></b>                   | <b><u>Flk Rescue?</u></b> | <b><u>Head Rescue?</u></b> |
| L-SNAP                                               | Yes                       | No                         |
| Aminoguanidine hemisulfate                           | Yes                       | No                         |
|                                                      |                           |                            |
| <b><u>NF-KB Inhibitors</u></b>                       | <b><u>Flk Rescue?</u></b> | <b><u>Head Rescue?</u></b> |
| Bay 11-7082                                          | Yes                       | No                         |
| Vinpocetine                                          | Yes                       | No                         |
|                                                      |                           |                            |
| <b><u>DNA synthesis Inhibitors</u></b>               | <b><u>Flk Rescue?</u></b> | <b><u>Head Rescue?</u></b> |
| Mitomycin C                                          | Yes                       | No                         |
| Aphidicolin                                          | Yes                       | No                         |
|                                                      |                           |                            |
| <b><u>Other</u></b>                                  | <b><u>Flk Rescue?</u></b> | <b><u>Head Rescue?</u></b> |
| Capsaicin (E)                                        | Yes                       | No                         |
| Pregnenolone-16-alpha-carbonitrile                   | Yes                       | No                         |
| Betaxolol-HCL                                        | Yes                       | No                         |

**Table S1. Summary of validated hits for screen phenotypes.**

Chemicals are grouped by mechanism of action.

**Flk1 Staining in rps29****Mutants**

Vehicle - 46 out of 53 embryos have low ISV staining

| <u>Drug</u>     | <u>Embryos Tested</u> | <u>Embryos with Wildtype ISV Staining</u> | <u>P-value (binomial test)</u> |
|-----------------|-----------------------|-------------------------------------------|--------------------------------|
| W-7             | 76                    | 32                                        | 3.89197E-10                    |
| A-7             | 31                    | 13                                        | 5.99465E-05                    |
| W-5             | 13                    | 7                                         | 0.000514238                    |
| Trifluoperazine | 24                    | 8                                         | 0.007060806                    |
| CGS 9343B       | 29                    | 14                                        | 4.55377E-06                    |
| Nimodipine      | 17                    | 7                                         | 0.003307119                    |
| YS-035          | 12                    | 5                                         | 0.011808909                    |

**Head Morphology in rps29 Mutants**

Vehicle - 34 out of 37 embryos have increased cell death in the head

| <u>Drug</u> | <u>Embryos Tested</u> | <u>Embryos without Cell Death in the Head</u> | <u>P-value (binomial test)</u> |
|-------------|-----------------------|-----------------------------------------------|--------------------------------|
| A-3         | 14                    | 8                                             | 3.37734E-06                    |

**Benzidine Staining in rps29 Mutants**

Vehicle - 34 out of 40 embryos have fewer hemoglobinized cells

| <u>Drug</u> | <u>Embryos Tested</u> | <u>Embryos with Higher Benzidine Staining</u> | <u>P-value (binomial test)</u> |
|-------------|-----------------------|-----------------------------------------------|--------------------------------|
| A-3         | 22                    | 10                                            | 2.87865E-06                    |
| W-7         | 36                    | 24                                            | 2.95725E-18                    |

**Phospho-H3 Staining in Irradiated Embryos**

Vehicle - 10 out of 10 embryos have few phospho-H3 positive cells

| <u>Drug</u>     | <u>Embryos Tested</u> | <u>Embryos with Higher Number of Phospho-H3 Positive Cells</u> | <u>P-value (binomial test)</u> |
|-----------------|-----------------------|----------------------------------------------------------------|--------------------------------|
| A-3             | 8                     | 5                                                              | 0                              |
| Trifluoperazine | 10                    | 6                                                              | 0                              |

**Table S2. Numbers of zebrafish embryos that respond to drug treatment, with statistical analysis.** Embryo counts for *flk1* staining, head morphology, benzdine staining, and phospho-H3 staining.
